# Supplementary material for: Topology-directed design and synthesis of carbazole-based conjugated microporous networks for gas storage
Source: Royal Society of Chemistry journal article supplement (doi:10.1039/c5ra09854h), 2015-01-01
Supplement: c5ra09854h1.pdf [file c5ra09854h1.pdf]

# Electronic Supplementary Information

for *RSC Advance*

## Topology-directed design and synthesis of carbazole-based conjugated microporous networks for gas storage

**Shanlin Qiao,<sup>a</sup> Wei Huang,<sup>a</sup> Huan Wei,<sup>ab</sup> Ting Wang,<sup>a</sup> and Renqiang Yang<sup>\*a</sup>**

<sup>a</sup> CAS Key Laboratory of Bio-based Materials, Qingdao Institute of Bioenergy and Bioprocess Technology, Chinese Academy of Sciences, Qingdao 266101, China

<sup>b</sup> School of Chemical and Pharmaceutical Engineering, Hebei University of Science and Technology, Shijiazhuang 050018, China

E-mail: yangrq@qibebt.ac.cn (R. Yang)

## FT-IR spectra

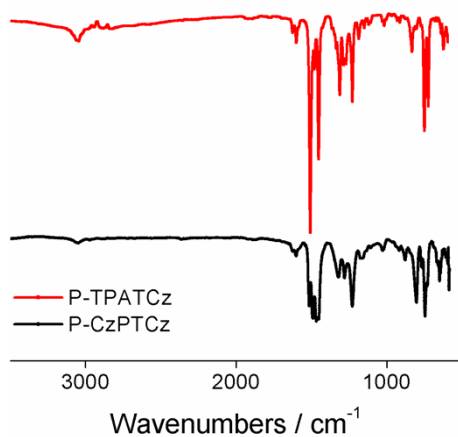

Figure S1. FT-IR spectra of P-TPATCz and P-CzPTCz.

## Scanning electron microscopy

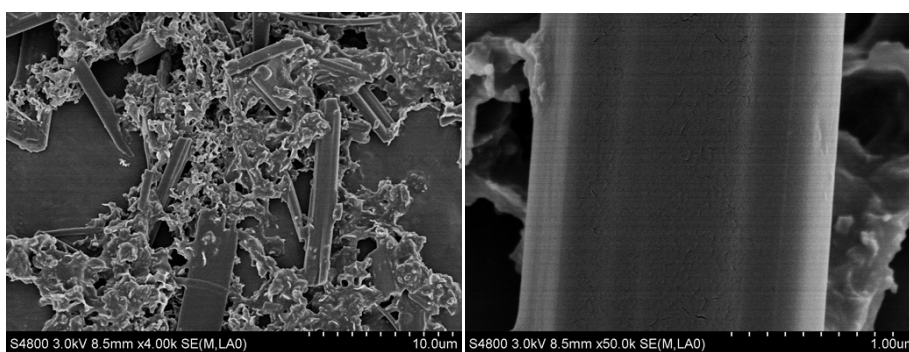

Figure S2. Scanning electron microscopy images of P-TPATCz networks with magnification of 4.0 k (left) and 50.0 k (right).

## Pore size distributions

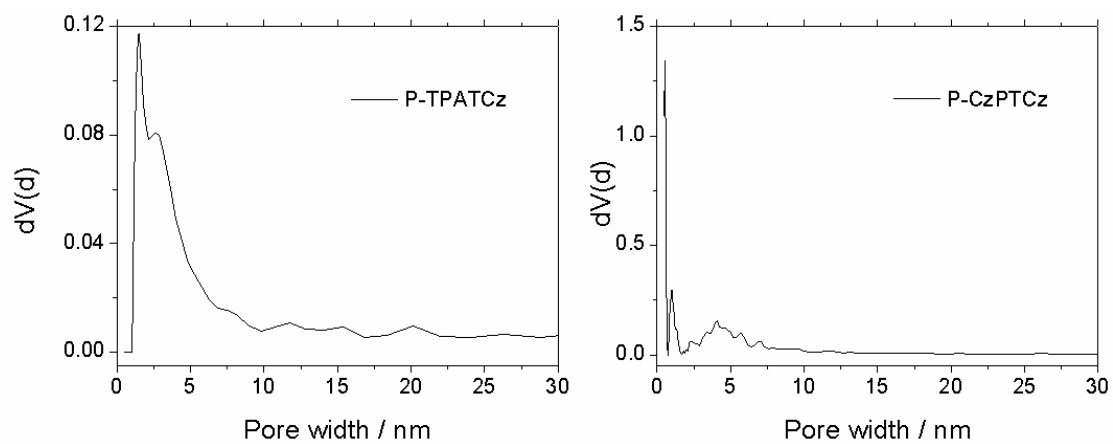

Figure S3. Pore size distributions calculated by application of quenched solid density functional theory (QSDFT).
